# Supplementary material
Source: ML conference proceedings conference paper supplement (https://openreview.net/forum?id=EzHQZ991im)

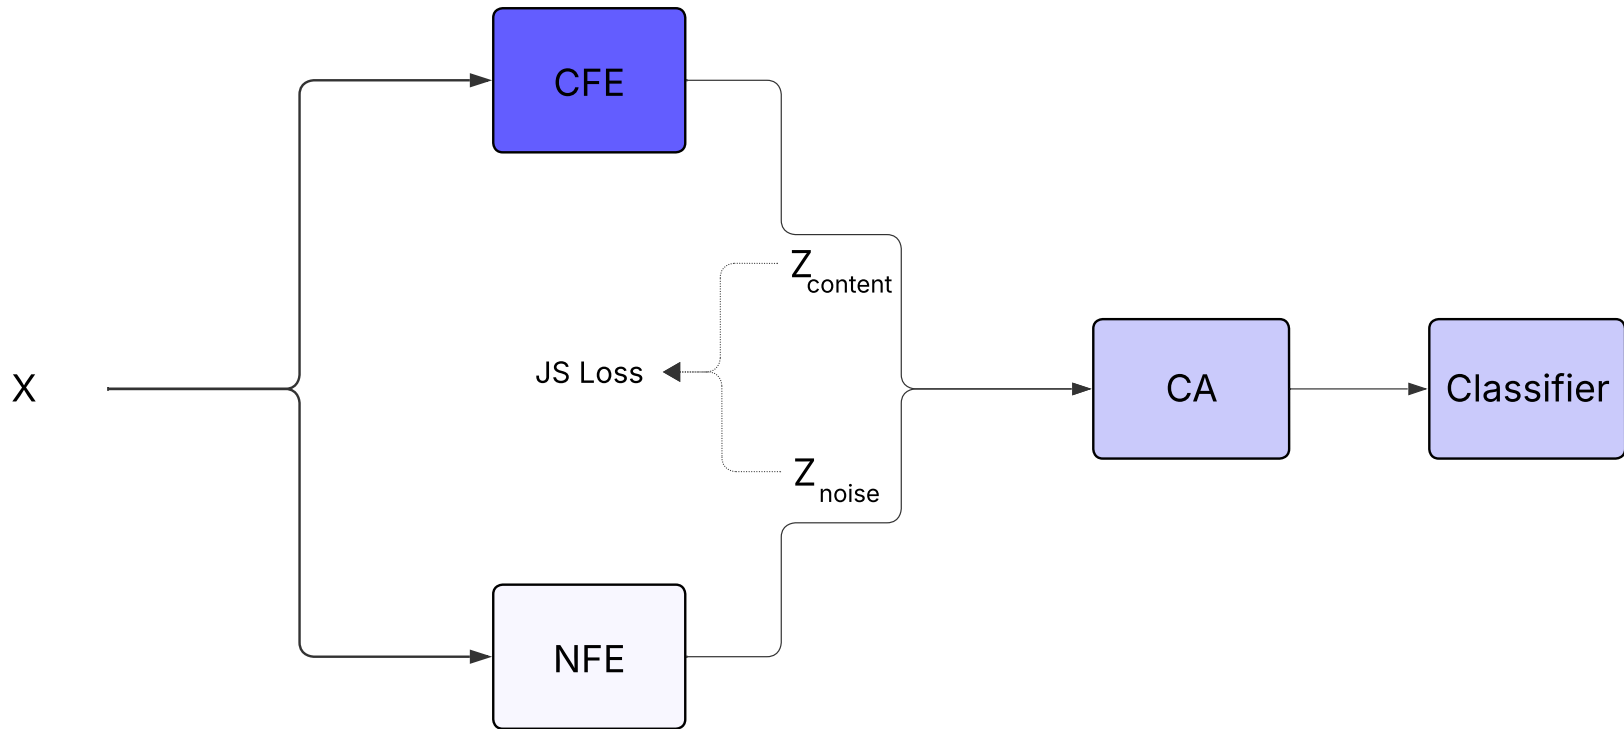

Supplement: supplementary_material [file DANCE.pdf › SONAR-CODE/figures/DANCE.pdf]

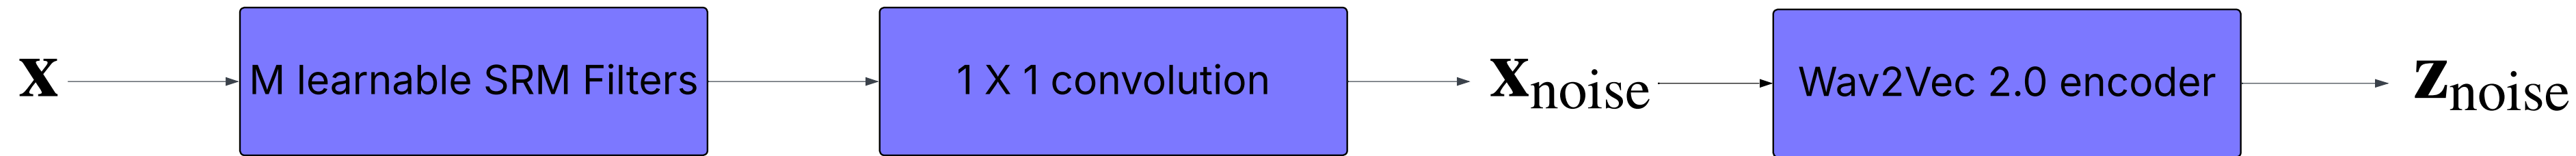

Supplement: supplementary_material [file NFE.pdf › SONAR-CODE/figures/NFE.pdf]

Cosine Similarity Density Function of the embeddings ( $Z_{low}$  and  $Z_{high}$ )

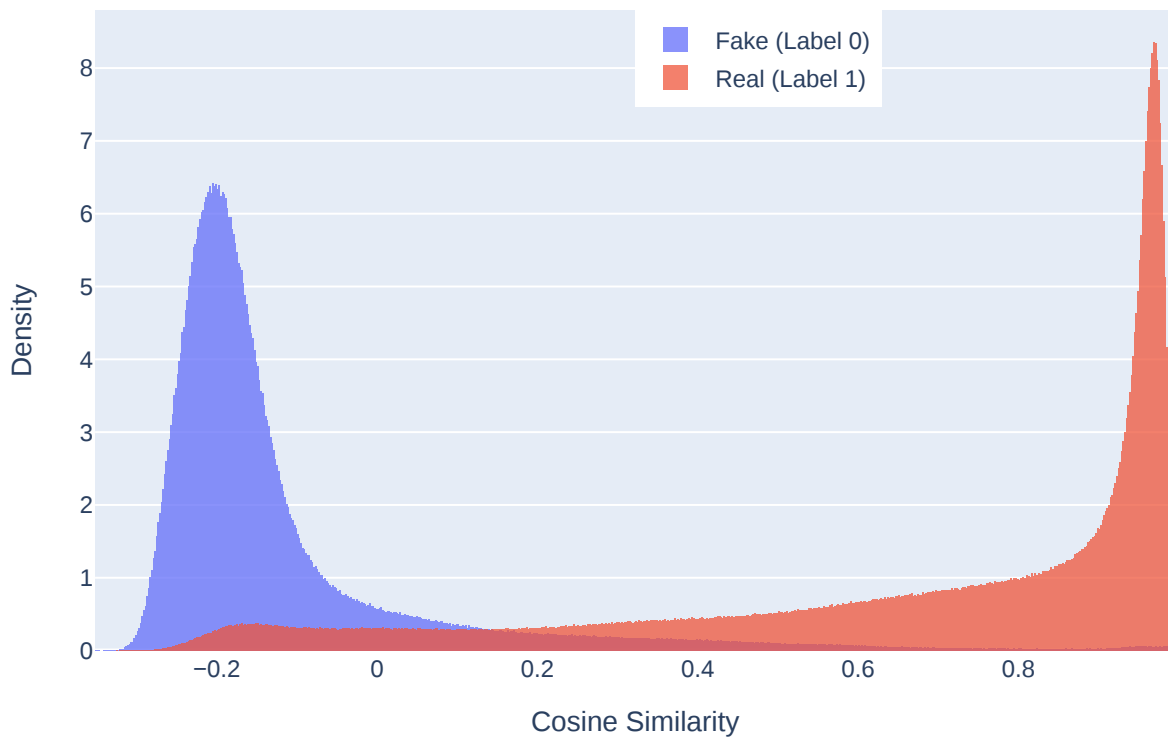

Supplement: supplementary_material [file histogram.pdf › SONAR-CODE/figures/histogram.pdf]
